# Supplementary material for: A Transcriptomic Model of Postnatal Cardiac Effects of Prenatal Maternal Cortisol Excess in Sheep
Source: PubMed Central journal article supplement (PMC6616147; doi:10.3389/fphys.2019.00816), 2019-07-03
Supplement: Table_1.pdf [file Table_1.pdf]

Supplemental Table 1: Differentially expressed genes (p<0.05) in Left Ventricle of 2week old lambs after maternal cortisol treatment

Fold changes are expressed as values in lambs of cortisol-treated ewes compared to control lambs

| <b>Official Symbol</b> | <b>Gene Name</b>                                                                               | <b>Fold Change</b> | <b>P.Value</b> |
|------------------------|------------------------------------------------------------------------------------------------|--------------------|----------------|
| GBP2                   | guanylate binding protein 2, interferon-inducible                                              | 2.41               | 0.0510         |
| RGS2                   | regulator of G-protein signaling 2                                                             | 1.55               | 0.0051         |
| INHA                   | inhibin, alpha                                                                                 | 1.51               | 0.0306         |
| MYL6B                  | myosin, light chain 6B                                                                         | 1.43               | 0.0115         |
| CINP                   | cyclin-dependent kinase 2-interacting protein                                                  | 1.37               | 0.0138         |
| C7orf23                | chromosome 7 open reading frame 23                                                             | 1.32               | 0.0414         |
| TOR3A                  | torsin family 3, member A                                                                      | 1.31               | 0.0477         |
| MOBK1A                 | MOB1, Mps One Binder kinase activator-like 1A (yeast)                                          | 1.31               | 0.0219         |
| FAM108C1               | family with sequence similarity 108, member C1                                                 | 1.29               | 0.0058         |
| TAF2                   | TATA box binding protein (TBP)-associated factor 2                                             | 1.28               | 0.0023         |
| PEG10                  | paternally expressed 10                                                                        | 1.27               | 0.0121         |
| GZMB                   | granzyme B                                                                                     | 1.27               | 0.0115         |
| ING3                   | inhibitor of growth family, member 3                                                           | 1.26               | 0.0158         |
| TMCO6                  | transmembrane and coiled-coil domains 6                                                        | 1.26               | 0.0008         |
| FBXO31                 | F-box protein 31                                                                               | 1.25               | 0.0126         |
| ALG1                   | asparagine-linked glycosylation 1                                                              | 1.25               | 0.0128         |
| DDX3X                  | DEAD (Asp-Glu-Ala-Asp) box polypeptide 3, X-linked                                             | 1.24               | 0.0528         |
| UBR1                   | ubiquitin protein ligase E3 component n-recognin 1                                             | 1.24               | 0.0439         |
| FKBP4                  | FK506 binding protein 4, 59kDa                                                                 | 1.23               | 0.0107         |
| MFN2                   | mitofusin 2                                                                                    | 1.23               | 0.0485         |
| FZD6                   | frizzled homolog 6 (Drosophila)                                                                | 1.23               | 0.0048         |
| CFL1                   | cofilin 1 (non-muscle)                                                                         | 1.23               | 0.0314         |
| REXO4                  | REX4, RNA exonuclease 4 homolog (S. cerevisiae)                                                | 1.22               | 0.0042         |
| SLC27A2                | solute carrier family 27 (fatty acid transporter), member 2                                    | 1.21               | 0.0238         |
| TIMM8A                 | translocase of inner mitochondrial membrane 8 homolog A                                        | 1.21               | 0.0156         |
| NME2                   | NME/NM23 Nucleoside Diphosphate Kinase 2                                                       | 1.21               | 0.0175         |
| DHRS11                 | dehydrogenase/reductase (SDR family) member 11                                                 | 1.21               | 0.0085         |
| TRAPPC6B               | trafficking protein particle complex 6B                                                        | 1.20               | 0.0276         |
| ABP1                   | amiloride binding protein 1 (amine oxidase (copper-containing))                                | 1.20               | 0.0440         |
| ACACB                  | acetyl-Coenzyme A carboxylase beta                                                             | 1.20               | 0.0231         |
| HERPUD1                | homocysteine-inducible, endoplasmic reticulum stress-inducible, ubiquitin-like domain member 1 | 1.20               | 0.0267         |
| ANAPC13                | anaphase promoting complex subunit 13                                                          | 1.19               | 0.0105         |
| BMI1                   | BMI1 polycomb ring finger oncogene                                                             | 1.19               | 0.0534         |
| ASNA1                  | arsA arsenite transporter, ATP-binding, homolog 1                                              | 1.19               | 0.0373         |

|           |                                                                                 |      |        |
|-----------|---------------------------------------------------------------------------------|------|--------|
| EGR3      | early growth response 3                                                         | 1.18 | 0.0245 |
| MRPL21    | mitochondrial ribosomal protein L21                                             | 1.18 | 0.0102 |
| ACAP1     | ArfGAP with coiled-coil, ankyrin repeat and PH domains 1                        | 1.18 | 0.0286 |
| SULF2     | sulfatase 2                                                                     | 1.18 | 0.0493 |
| PPID      | peptidylprolyl isomerase D                                                      | 1.18 | 0.0524 |
| TCEB2     | transcription elongation factor B (SIII), polypeptide 2 (18kDa, elongin B)      | 1.18 | 0.0022 |
| WSB2      | WD repeat and SOCS box-containing 2                                             | 1.17 | 0.0129 |
| DSCC1     | defective in sister chromatid cohesion 1 homolog ( <i>S. cerevisiae</i> )       | 1.17 | 0.0190 |
| RCHY1     | ring finger and CHY zinc finger domain containing 1                             | 1.17 | 0.0030 |
| SLC38A5   | solute carrier family 38, member 5                                              | 1.17 | 0.0510 |
| CDK18     | PCTAIRE protein kinase 3                                                        | 1.17 | 0.0329 |
| SNTB2     | syntrophin, beta 2 (dystrophin-associated protein A1, 59kDa, basic component 2) | 1.17 | 0.0371 |
| BRWD1     | bromodomain and WD repeat domain containing 1                                   | 1.17 | 0.0538 |
| SF3B3     | splicing factor 3b, subunit 3, 130kDa                                           | 1.17 | 0.0144 |
| NR3C1     | nuclear receptor subfamily 3, group C, member 1                                 | 1.16 | 0.0363 |
| KIDINS220 | kinase D-interacting substrate, 220kDa                                          | 1.16 | 0.0158 |
| NRP1      | neuropilin 1                                                                    | 1.16 | 0.0181 |
| DUSP6     | dual specificity phosphatase 6                                                  | 1.16 | 0.0498 |
| SREBF1    | sterol regulatory element binding transcription factor 1                        | 1.16 | 0.0244 |
| LNK2      | ligand of numb-protein X 2                                                      | 1.16 | 0.0369 |
| ANXA6     | annexin A6                                                                      | 1.16 | 0.0523 |
| CBR4      | carbonyl reductase 4                                                            | 1.16 | 0.0312 |
| SDCCAG8   | serologically defined colon cancer antigen 8                                    | 1.15 | 0.0102 |
| GABPA     | GA binding protein transcription factor, alpha subunit 60kDa                    | 1.15 | 0.0198 |
| GTF2H5    | general transcription factor IIH, polypeptide 5                                 | 1.15 | 0.0416 |
| MRPL19    | mitochondrial ribosomal protein L19                                             | 1.15 | 0.0359 |
| ATP5S     | ATP synthase, H <sup>+</sup> transporting, mitochondrial F0 complex, subunit s  | 1.15 | 0.0314 |
| MRPL48    | mitochondrial ribosomal protein L48                                             | 1.15 | 0.0112 |
| PIN1      | peptidylprolyl cis/trans isomerase, NIMA-interacting 1                          | 1.15 | 0.0335 |
| HDGF      | hepatoma-derived growth factor (high-mobility group protein 1-like)             | 1.15 | 0.0207 |
| C19orf2   | chromosome 19 open reading frame 2                                              | 1.15 | 0.0432 |
| UCKL1     | uridine-cytidine kinase 1-like 1                                                | 1.15 | 0.0237 |
| TOMM40    | translocase of outer mitochondrial membrane 40 homolog                          | 1.14 | 0.0308 |
| TOMM5     | translocase of outer mitochondrial membrane 5 homolog                           | 1.14 | 0.0246 |
| CISD1     | CDGSH iron sulfur domain 1                                                      | 1.14 | 0.0321 |
| LRRRC47   | leucine rich repeat containing 47                                               | 1.14 | 0.0180 |

|          |                                                                                          |      |        |
|----------|------------------------------------------------------------------------------------------|------|--------|
| ELAVL1   | ELAV (embryonic lethal, abnormal vision, Drosophila)-like 1 (Hu antigen R)               | 1.14 | 0.0088 |
| DNAJC11  | DnaJ (Hsp40) homolog, subfamily C, member 11                                             | 1.14 | 0.0411 |
| CNOT7    | CCR4-NOT transcription complex, subunit 7                                                | 1.13 | 0.0468 |
| ZFAND5   | similar to zinc finger, AN1-type domain 5; zinc finger, AN1-type domain 5                | 1.13 | 0.0186 |
| IPO5     | importin 5                                                                               | 1.13 | 0.0442 |
| KLHL9    | kelch-like 9 (Drosophila)                                                                | 1.13 | 0.0508 |
| FNIP1    | folliculin interacting protein 1                                                         | 1.13 | 0.0502 |
| KCTD20   | potassium channel tetramerisation domain containing 20                                   | 1.13 | 0.0261 |
| SLC7A1   | solute carrier family 7 (cationic amino acid transporter, $\gamma$ -system), member 1    | 1.13 | 0.0418 |
| PEX13    | peroxisomal biogenesis factor 13                                                         | 1.12 | 0.0531 |
| MMAB     | methylmalonic aciduria (cobalamin deficiency) cblB type                                  | 1.12 | 0.0403 |
| NUMB     | numb homolog (Drosophila)                                                                | 1.12 | 0.0521 |
| C19orf43 | chromosome 19 open reading frame 43                                                      | 1.12 | 0.0272 |
| ARHGAP29 | Rho GTPase activating protein 29                                                         | 1.12 | 0.0468 |
| ZNF292   | zinc finger protein 292                                                                  | 1.12 | 0.0462 |
| HPRT1    | hypoxanthine phosphoribosyltransferase 1                                                 | 1.11 | 0.0231 |
| MRPS10   | mitochondrial ribosomal protein S10                                                      | 1.11 | 0.0296 |
| ZNF414   | zinc finger protein 414                                                                  | 1.11 | 0.0108 |
| PHOSPHO2 | phosphatase, orphan 2                                                                    | 1.11 | 0.0507 |
| BIRC6    | baculoviral IAP repeat-containing 6                                                      | 1.11 | 0.0216 |
| CALM2    | calmodulin 2 (phosphorylase kinase, delta)                                               | 1.11 | 0.0542 |
| FOXS1    | forkhead box S1                                                                          | 1.11 | 0.0108 |
| PTOV1    | prostate tumor overexpressed 1                                                           | 1.11 | 0.0159 |
| CTDSPL2  | CTD (carboxy-terminal domain, RNA polymerase II, polypeptide A) small phosphatase like 2 | 1.10 | 0.0387 |
| CTDSP1   | CTD (carboxy-terminal domain, RNA polymerase II, polypeptide A) small phosphatase 1      | 1.10 | 0.0385 |
| PPP2R4   | protein phosphatase 2A activator, regulatory subunit 4                                   | 1.10 | 0.0300 |
| RB1CC1   | RB1-inducible coiled-coil 1                                                              | 1.10 | 0.0496 |
| C9orf80  | chromosome 9 open reading frame 80                                                       | 1.10 | 0.0321 |
| ZBTB11   | zinc finger and BTB domain containing 11                                                 | 1.10 | 0.0526 |
| UBA2     | ubiquitin-like modifier activating enzyme 2                                              | 1.10 | 0.0324 |
| PSMG2    | proteasome (prosome, macropain) assembly chaperone 2                                     | 1.10 | 0.0437 |
| CHMP2B   | chromatin modifying protein 2B                                                           | 1.10 | 0.0360 |
| ZFAND6   | zinc finger, AN1-type domain 6                                                           | 1.10 | 0.0426 |
| MAP2     | microtubule-associated protein 2                                                         | 1.10 | 0.0540 |
| SRPK2    | SFRS protein kinase 2                                                                    | 1.10 | 0.0375 |
| PPM1A    | protein phosphatase 1A                                                                   | 1.09 | 0.0407 |

|          |                                                                                                                                  |      |        |
|----------|----------------------------------------------------------------------------------------------------------------------------------|------|--------|
| USP39    | ubiquitin specific peptidase 39                                                                                                  | 1.09 | 0.0464 |
| AGPS     | alkylglycerone phosphate synthase                                                                                                | 1.09 | 0.0243 |
| TICAM2   | toll-like receptor adaptor molecule 2                                                                                            | 1.09 | 0.0539 |
| ETF1     | eukaryotic translation termination factor 1                                                                                      | 1.09 | 0.0482 |
| PIP4K2A  | phosphatidylinositol-5-phosphate 4-kinase, type II, alpha                                                                        | 1.09 | 0.0354 |
| SNX3     | sorting nexin 3                                                                                                                  | 1.09 | 0.0433 |
| LUZP6    | myotrophin; leucine zipper protein 6                                                                                             | 1.08 | 0.0484 |
| STARD13  | StAR-related lipid transfer (START) domain containing 13                                                                         | 1.07 | 0.0496 |
| C1orf212 | chromosome 1 open reading frame 212                                                                                              | 0.93 | 0.0538 |
| FAM175B  | family with sequence similarity 175, member B                                                                                    | 0.92 | 0.0438 |
| HNRNPUL1 | heterogeneous nuclear ribonucleoprotein U-like 1                                                                                 | 0.92 | 0.0502 |
| RPS2     | ribosomal protein S2                                                                                                             | 0.92 | 0.0313 |
| SRSF4    | serine and arginine rich splicing factor 4                                                                                       | 0.92 | 0.0386 |
| GART     | phosphoribosylglycinamide formyltransferase,<br>phosphoribosylglycinamide synthetase,<br>phosphoribosylaminoimidazole synthetase | 0.91 | 0.0451 |
| SNAPIN   | SNAP-associated protein                                                                                                          | 0.91 | 0.0543 |
| CLOCK    | clock homolog (mouse)                                                                                                            | 0.91 | 0.0130 |
| UBTD1    | ubiquitin domain containing 1                                                                                                    | 0.91 | 0.0278 |
| THYN1    | thymocyte nuclear protein 1                                                                                                      | 0.91 | 0.0381 |
| MESDC2   | mesoderm development candidate 2                                                                                                 | 0.91 | 0.0514 |
| SRL      | sarcalumenin                                                                                                                     | 0.91 | 0.0157 |
| WAPAL    | wings apart-like homolog (Drosophila)                                                                                            | 0.91 | 0.0231 |
| SAP30BP  | SAP30 binding protein                                                                                                            | 0.90 | 0.0538 |
| GLT8D1   | glycosyltransferase 8 domain containing 1                                                                                        | 0.90 | 0.0323 |
| CYBA     | cytochrome b-245, alpha polypeptide                                                                                              | 0.90 | 0.0337 |
| SDF2     | stromal cell-derived factor 2                                                                                                    | 0.90 | 0.0209 |
| DENND4B  | DENN/MADD domain containing 4B                                                                                                   | 0.90 | 0.0442 |
| NUMA1    | nuclear mitotic apparatus protein 1                                                                                              | 0.90 | 0.0538 |
| SLC50A1  | solute carrier family 50 member 1                                                                                                | 0.90 | 0.0517 |
| IFT46    | intraflagellar transport 46                                                                                                      | 0.90 | 0.0306 |
| TAF10    | TAF10 RNA polymerase II, TATA box binding protein (TBP)-<br>associated factor, 30kDa                                             | 0.90 | 0.0433 |
| NTHL1    | nth endonuclease III-like 1                                                                                                      | 0.90 | 0.0154 |
| CC2D1B   | coiled-coil and C2 domain containing 1B                                                                                          | 0.90 | 0.0286 |
| DDRGK1   | DDRGK domain containing 1                                                                                                        | 0.90 | 0.0095 |
| RPS8     | ribosomal protein S8                                                                                                             | 0.90 | 0.0280 |
| CHAF1A   | chromatin assembly factor 1, subunit A (p150)                                                                                    | 0.90 | 0.0327 |
| RUFY3    | RUN and FYVE domain containing 3                                                                                                 | 0.90 | 0.0527 |
| C17orf59 | chromosome 17 open reading frame 59                                                                                              | 0.90 | 0.0312 |
| POP7     | processing of precursor 7, ribonuclease P/MRP subunit                                                                            | 0.89 | 0.0273 |

|            |                                                                          |      |        |
|------------|--------------------------------------------------------------------------|------|--------|
| TUSC2      | tumor suppressor candidate 2                                             | 0.89 | 0.0466 |
| ELAC1      | elaC homolog 1 (E. coli)                                                 | 0.89 | 0.0110 |
| RFFL       | ring finger and FYVE-like domain containing 1                            | 0.89 | 0.0347 |
| SREK1IP1   | SREK 1 interacting protein 1                                             | 0.89 | 0.0373 |
| CDK7       | cyclin-dependent kinase 7                                                | 0.89 | 0.0427 |
| DSCR3      | Down syndrome critical region gene 3                                     | 0.89 | 0.0441 |
| QPCTL      | glutaminyl-peptide cyclotransferase-like                                 | 0.89 | 0.0268 |
| TMEM179B   | transmembrane protein 179B                                               | 0.89 | 0.0304 |
| TLR6       | toll-like receptor 6                                                     | 0.89 | 0.0456 |
| C12orf11   | chromosome 12 open reading frame 11                                      | 0.89 | 0.0216 |
| IL17D      | interleukin 17D                                                          | 0.88 | 0.0460 |
| ZBTB6      | zinc finger and BTB domain containing 6                                  | 0.88 | 0.0402 |
| MICALL1    | MICAL-like 1                                                             | 0.88 | 0.0486 |
| C9orf16    | chromosome 9 open reading frame 16                                       | 0.88 | 0.0385 |
| PPAP2C     | phosphatidic acid phosphatase type 2C                                    | 0.88 | 0.0342 |
| RAB11FIP5  | RAB11 family interacting protein 5 (class I)                             | 0.88 | 0.0508 |
| SLC12A7    | solute carrier family 12 (potassium/chloride transporters), member 7     | 0.88 | 0.0486 |
| C15orf24   | chromosome 15 open reading frame 24                                      | 0.88 | 0.0345 |
| FAM3C      | family with sequence similarity 3, member C                              | 0.88 | 0.0281 |
| PLCD1      | phospholipase C, delta 1                                                 | 0.88 | 0.0230 |
| DCP2       | decapping MRNA2                                                          | 0.87 | 0.0248 |
| RBFOX2     | RNA binding FOX homolog 2                                                | 0.87 | 0.0029 |
| MPG        | N-methylpurine-DNA glycosylase                                           | 0.87 | 0.0290 |
| KEAP1      | kelch-like ECH-associated protein 1                                      | 0.87 | 0.0342 |
| STAP2      | signal transducing adaptor family member 2                               | 0.87 | 0.0234 |
| CREB3      | cAMP responsive element binding protein 3                                | 0.87 | 0.0091 |
| TRAPPC2L   | trafficking protein particle complex 2-like                              | 0.87 | 0.0378 |
| CHD4       | chromodomain helicase DNA binding protein 4                              | 0.87 | 0.0156 |
| SART3      | squamous cell carcinoma antigen recognized by T cells 3                  | 0.87 | 0.0379 |
| FANCG      | Fanconi anemia, complementation group G                                  | 0.87 | 0.0048 |
| TUBB2C     | tubulin, beta 2C                                                         | 0.87 | 0.0505 |
| ABCB10     | ATP-binding cassette, sub-family B (MDR/TAP), member 10                  | 0.87 | 0.0336 |
| C1H21ORF59 |                                                                          | 0.87 | 0.0420 |
| ATP1B3     | ATPase, Na <sup>+</sup> /K <sup>+</sup> transporting, beta 3 polypeptide | 0.87 | 0.0382 |
| ORM1       | orosomuroid 1                                                            | 0.87 | 0.0403 |
| N6AMT2     | N-6 adenine-specific DNA methyltransferase 2 (putative)                  | 0.87 | 0.0389 |
| PGRMC2     | progesterone receptor membrane component 2                               | 0.86 | 0.0130 |
| EIF4G1     | eukaryotic translation initiation factor 4 gamma, 1                      | 0.86 | 0.0105 |
| THRB       | thyroid hormone receptor, beta                                           | 0.86 | 0.0249 |
| ST6GAL1    | ST6 beta-galactosamide alpha-2,6-sialyltransferase 1                     | 0.86 | 0.0199 |

|             |                                                            |      |        |
|-------------|------------------------------------------------------------|------|--------|
| NARS        | asparaginyl-tRNA synthetase                                | 0.86 | 0.0382 |
| ATG16L1     | ATG16 autophagy related 16-like 1 ( <i>S. cerevisiae</i> ) | 0.86 | 0.0542 |
| CYP27A1     | cytochrome P450, family 27, subfamily A, polypeptide 1     | 0.86 | 0.0108 |
| PIGT        | phosphatidylinositol glycan anchor biosynthesis, class T   | 0.86 | 0.0267 |
| EML4        | echinoderm microtubule associated protein like 4           | 0.86 | 0.0507 |
| PBXIP1      | pre-B-cell leukemia homeobox interacting protein 1         | 0.86 | 0.0291 |
| HFE         | hemochromatosis                                            | 0.86 | 0.0038 |
| BLCAP       | bladder cancer associated protein                          | 0.86 | 0.0063 |
| TUBB2B      | tubulin, beta 2B                                           | 0.86 | 0.0282 |
| NPEPPS      | aminopeptidase puromycin sensitive                         | 0.86 | 0.0344 |
| PICK1       | protein interacting with PRKCA 1                           | 0.86 | 0.0239 |
| TUBB3       | tubulin, beta 3; melanocortin 1 receptor                   | 0.86 | 0.0290 |
| SURF6       | surfeit 6                                                  | 0.86 | 0.0321 |
| DERL1       | Der1-like domain family, member 1                          | 0.86 | 0.0333 |
| IMP4        | U3 small nucleolar ribonucleoprotein                       | 0.85 | 0.0433 |
| FUBP1       | far upstream element (FUSE) binding protein 1              | 0.85 | 0.0509 |
| DHCR7       | 7-dehydrocholesterol reductase                             | 0.85 | 0.0473 |
| PSMD7       | proteasome 26S subunit, non-ATPase, 7                      | 0.85 | 0.0046 |
| OSTBETA     | organic solute transporter beta                            | 0.85 | 0.0087 |
| RWDD2A      | RWD domain containing 2A                                   | 0.85 | 0.0142 |
| C14H11orf75 |                                                            | 0.85 | 0.0178 |
| VEZF1       | vascular endothelial zinc finger 1                         | 0.85 | 0.0472 |
| ZMYND11     | zinc finger, MYND domain containing 11                     | 0.85 | 0.0277 |
| EXOSC2      | exosome component 2                                        | 0.85 | 0.0230 |
| EZH1        | enhancer of zeste homolog 1                                | 0.85 | 0.0517 |
| LATS2       | LATS, large tumor suppressor, homolog 2                    | 0.84 | 0.0039 |
| CSNK1E      | casein kinase 1, epsilon                                   | 0.84 | 0.0384 |
| BAX         | BCL2-associated X protein                                  | 0.83 | 0.0066 |
| CNOT10      | CCR4-NOT transcription complex, subunit 10                 | 0.83 | 0.0355 |
| CRYL1       | crystallin, lambda 1                                       | 0.83 | 0.0262 |
| DKC1        | dyskeratosis congenita 1, dyskerin                         | 0.83 | 0.0530 |
| NCOR1       | nuclear receptor co-repressor 1                            | 0.83 | 0.0402 |
| LRSAM1      | leucine rich repeat and sterile alpha motif containing 1   | 0.83 | 0.0216 |
| MAF         | MAF BZIP transcription factor                              | 0.83 | 0.0059 |
| QSOX2       | quiescin Q6 sulfhydryl oxidase 2                           | 0.83 | 0.0413 |
| AKR1E2      | aldo-keto reductase family 1, member C-like 2              | 0.83 | 0.0347 |
| ADRB1       | adrenergic, beta-1-, receptor                              | 0.82 | 0.0135 |
| TRIM45      | tripartite motif-containing 45                             | 0.82 | 0.0125 |
| BTBD10      | BTB (POZ) domain containing 10                             | 0.81 | 0.0082 |
| C20orf108   | chromosome 20 open reading frame 108                       | 0.81 | 0.0323 |
| ABR         | active BCR-related gene                                    | 0.81 | 0.0543 |

|          |                                                              |      |        |
|----------|--------------------------------------------------------------|------|--------|
| CCDC76   | coiled-coil domain containing 76                             | 0.81 | 0.0198 |
| RAD50    | RAD50 homolog ( <i>S. cerevisiae</i> )                       | 0.81 | 0.0441 |
| PTGER3   | prostaglandin E receptor 3 (subtype EP3)                     | 0.81 | 0.0106 |
| CSNK1G2  | casein kinase 1, gamma 2                                     | 0.81 | 0.0028 |
| DPY19L1  | dpy-19-like 1 ( <i>C. elegans</i> ); similar to hCG1645499   | 0.81 | 0.0227 |
| TMEM106C | transmembrane protein 106C                                   | 0.80 | 0.0096 |
| EIF3A    | eukaryotic translation initiation factor 3, subunit A        | 0.80 | 0.0338 |
| TBC1D7   | TBC1 domain family, member 7                                 | 0.80 | 0.0038 |
| DDX19B   | DEAD (Asp-Glu-Ala-As) box polypeptide 19B                    | 0.80 | 0.0117 |
| MYSM1    | Myb-like, SWIRM and MPN domains 1                            | 0.79 | 0.0062 |
| TSPO     | translocator protein (18kDa)                                 | 0.78 | 0.0424 |
| GRAP     | GRB2-related adaptor protein                                 | 0.78 | 0.0127 |
| IWS1     | IWS1 homolog ( <i>S. cerevisiae</i> )                        | 0.76 | 0.0235 |
| LGMN     | legumain                                                     | 0.76 | 0.0088 |
| PAPOLA   | poly(A) polymerase alpha                                     | 0.76 | 0.0303 |
| SCPEP1   | serine carboxypeptidase 1                                    | 0.76 | 0.0112 |
| CAST     | calpastatin                                                  | 0.75 | 0.0279 |
| PDE4B    | phosphodiesterase 4B, cAMP-specific                          | 0.75 | 0.0269 |
| COPB2    | coatamer protein complex, subunit beta 2                     | 0.75 | 0.0001 |
| ZNF691   | zinc finger protein 691                                      | 0.74 | 0.0015 |
| C9orf78  | chromosome 9 open reading frame 78                           | 0.74 | 0.0049 |
| GHR      | growth hormone receptor                                      | 0.74 | 0.0027 |
| ADD1     | adducin 1 (alpha)                                            | 0.72 | 0.0148 |
| NUDT16   | nudix (nucleoside diphosphate linked moiety X)-type motif 16 | 0.71 | 0.0207 |
| RBP7     | retinol binding protein 7, cellular                          | 0.70 | 0.0133 |
| MYO18A   | myosin XVIII A                                               | 0.69 | 0.0071 |
| TCEAL2   | transcription elongation factor A (SII)-like 2               | 0.68 | 0.0115 |
| ABCF1    | ATP-binding cassette, sub-family F (GCN20), member 1         | 0.67 | 0.0106 |
| DNAJC21  | DnaJ (Hsp40) homolog, subfamily C, member 21                 | 0.67 | 0.0005 |
| SBSN     | suprabasin                                                   | 0.66 | 0.0033 |
| XPO4     | exportin 4                                                   | 0.65 | 0.0172 |
| TMOD3    | tropomodulin 3 (ubiquitous)                                  | 0.65 | 0.0109 |
| DHRS13   | dehydrogenase/reductase (SDR family) member 13               | 0.63 | 0.0201 |
| HBA1     | hemoglobin, alpha 2; hemoglobin, alpha 1                     | 0.46 | 0.0110 |
