# Supplementary material for: A Transcriptomic Model of Postnatal Cardiac Effects of Prenatal Maternal Cortisol Excess in Sheep
Source: PubMed Central journal article supplement (PMC6616147; doi:10.3389/fphys.2019.00816), 2019-07-03
Supplement: Table_2.pdf [file Table_2.pdf]

Supplemental Table 2: Differentially expressed genes (p<0.05) in Intraventricular Septum of 2week old lambs after maternal cortisol treatment

Fold changes are expressed as values in lambs of cortisol-treated ewes compared to control lambs

| <b>OFFICIAL SYMBOL</b> | <b>Gene Name</b>                                             | <b>Fold Change</b> | <b>P.Value</b> |
|------------------------|--------------------------------------------------------------|--------------------|----------------|
| CLCN6                  | chloride channel 6                                           | 4.43               | 0.0121         |
| CDK2AP2                | cyclin-dependent kinase 2 associated protein 2               | 3.43               | 0.0091         |
| TM9SF2                 | transmembrane 9 superfamily member 2                         | 3.24               | 0.0164         |
| NDOR1                  | NADPH dependent diflavin oxidoreductase 1                    | 3.19               | 0.0157         |
| LSR                    | lipolysis stimulated lipoprotein receptor                    | 2.95               | 0.0097         |
| LSM14A                 | LSM14A, SCD6 homolog A ( <i>S. cerevisiae</i> )              | 2.69               | 0.0273         |
| DEFA6                  | defensin, alpha 6, Paneth cell-specific                      | 2.67               | 0.0068         |
| <b>DGAT2</b>           | diacylglycerol O-acyltransferase homolog 2                   | 2.62               | 0.0024         |
| CLASP1                 | cytoplasmic linker associated protein 1                      | 2.48               | 0.0192         |
| TSC2                   | tuberous sclerosis 2                                         | 2.29               | 0.0085         |
| KLHL26                 | kelch-like 26                                                | 2.26               | 0.0544         |
| GPC1                   | glypican 1                                                   | 2.25               | 0.0135         |
| KIAA1826               | KIAA1826                                                     | 2.17               | 0.0532         |
| CARHSP1                | calcium regulated heat stable protein 1, 24kDa               | 2.05               | 0.0403         |
| CXCL2                  | chemokine (C-X-C motif) ligand 2                             | 2.05               | 0.0201         |
| NAPSA                  | napsin A aspartic peptidase                                  | 1.94               | 0.0523         |
| C19orf61               | chromosome 19 open reading frame 61                          | 1.87               | 0.0107         |
| CDC42EP5               | CDC42 effector protein (Rho GTPase binding) 5                | 1.86               | 0.0422         |
| FBLN5                  | fibulin 5                                                    | 1.81               | 0.0517         |
| RGS2                   | regulator of G-protein signaling 2, 24kDa                    | 1.69               | 0.0016         |
| SEC24C                 | SEC24 family, member C                                       | 1.65               | 0.0276         |
| FIZ1                   | FLT3-interacting zinc finger 1                               | 1.65               | 0.0242         |
| TAX1BP3                | Tax1 (T-cell leukemia virus type I) binding protein 3        | 1.59               | 0.0375         |
| MYL6B                  | myosin, light chain 6B                                       | 1.58               | 0.0153         |
| FRK                    | fyn-related kinase                                           | 1.57               | 0.0478         |
| NOP10                  | NOP10 ribonucleoprotein homolog                              | 1.55               | 0.0295         |
| IGL@                   | immunoglobulin lambda locus                                  | 1.54               | 0.0408         |
| ATP2A3                 | ATPase, Ca <sup>++</sup> transporting, ubiquitous            | 1.54               | 0.0359         |
| USP5                   | ubiquitin specific peptidase 5                               | 1.50               | 0.0319         |
| MFAP2                  | microfibrillar-associated protein 2                          | 1.46               | 0.0251         |
| ING3                   | inhibitor of growth family, member 3                         | 1.41               | 0.0133         |
| C15orf48               | chromosome 15 open reading frame 48                          | 1.40               | 0.0106         |
| TNFAIP8                | tumor necrosis factor, alpha-induced protein 8               | 1.39               | 0.0404         |
| RBM18                  | RNA binding motif protein 18                                 | 1.38               | 0.0521         |
| KIF2C                  | kinesin family member 2C                                     | 1.37               | 0.0502         |
| KCNJ1                  | potassium inwardly-rectifying channel, subfamily J, member 1 | 1.37               | 0.0179         |

|           |                                                                                |      |        |
|-----------|--------------------------------------------------------------------------------|------|--------|
| UBR1      | ubiquitin protein ligase E3 component n-recognin 1                             | 1.35 | 0.0135 |
| RPL13A    | ribosomal protein L13a                                                         | 1.35 | 0.0276 |
| TCEB1     | elongin C                                                                      | 1.33 | 0.0173 |
| RNF126    | ring finger protein 126                                                        | 1.32 | 0.0236 |
| ECI1      | enoyl coenzyme A delta isomerase 1                                             | 1.32 | 0.0398 |
| CBR1      | carbonyl reductase 1                                                           | 1.32 | 0.0416 |
| ACYP1     | acylphosphatase 1                                                              | 1.31 | 0.0458 |
| C21orf33  | chromosome 21 open reading frame 33                                            | 1.31 | 0.0334 |
| SPHK1     | sphingosine kinase 1                                                           | 1.30 | 0.0344 |
| HERPUD1   | homocysteine-inducible endoplasmic reticulu protein with ubiquitin-like domain | 1.30 | 0.0056 |
| MRPS11    | mitochondrial ribosomal protein S11                                            | 1.29 | 0.0386 |
| TMCO6     | transmembrane and coiled-coil domains 6                                        | 1.29 | 0.0135 |
| UBA52     | ubiquitin A-52 residue ribosomal protein fusion product 1                      | 1.28 | 0.0366 |
| AIMP2     | aminoacyl tRNA synthetase complex-interacting multifunctional protein 2        | 1.28 | 0.0037 |
| SYMPK     | symplekin                                                                      | 1.28 | 0.0340 |
| SEC13     | SEC13 homolog                                                                  | 1.28 | 0.0250 |
| CCL14     | chemokine (C-C motif) ligand 14                                                | 1.28 | 0.0359 |
| TCEANC2   | transcription elongation factor N-terminal and central domain containing 2     | 1.28 | 0.0326 |
| DYNLRB1   | dynein light chain roadblock-type 1                                            | 1.28 | 0.0468 |
| SYS1      | SYS1 Golgi-localized integral membrane protein homolog                         | 1.27 | 0.0135 |
| TSPAN4    | tetraspanin 4                                                                  | 1.27 | 0.0168 |
| PRADC1    | protease associated domain containing 1                                        | 1.26 | 0.0531 |
| ANAPC11   | anaphase promoting complex subunit 11                                          | 1.26 | 0.0389 |
| PABPC1    | poly(A) binding protein cytoplasmic 1                                          | 1.26 | 0.0524 |
| GRINA     | glutamate ionotropic receptor N-methyl D-aspartate-associated protein 1        | 1.26 | 0.0518 |
| SPSB1     | spla/ryanodine receptor domain and SOCS box containing 1                       | 1.26 | 0.0070 |
| YPEL1     | yippee-like 1                                                                  | 1.25 | 0.0503 |
| TOMM5     | translocase of outer mitochondrial membrane 5 homolog (yeast)                  | 1.25 | 0.0495 |
| HIPK3     | homeodomain interacting protein kinase 3                                       | 1.25 | 0.0183 |
| MPST      | mercaptopyruvate sulfurtransferase                                             | 1.24 | 0.0085 |
| TMEM80    | transmembrane protein 80                                                       | 1.24 | 0.0544 |
| YIPF6     | Yip1 domain family, member 6                                                   | 1.23 | 0.0451 |
| VPS28     | vacuolar protein sorting 28                                                    | 1.23 | 0.0115 |
| LIMCH1    | LIM and calponin homology domains 1                                            | 1.23 | 0.0171 |
| FABP4     | fatty acid binding protein 4                                                   | 1.23 | 0.0087 |
| CISD1     | CDGSH iron sulfur domain 1                                                     | 1.23 | 0.0282 |
| KPNA4     | karyopherin alpha 4                                                            | 1.22 | 0.0530 |
| KRTAP13-1 | keratin associated protein 13-1                                                | 1.22 | 0.0215 |
| DIDO1     | death inducer-obliterator 1                                                    | 1.22 | 0.0485 |

|          |                                                                          |      |        |
|----------|--------------------------------------------------------------------------|------|--------|
| SNRPB    | small nuclear ribonucleoprotein polypeptides B and B1                    | 1.22 | 0.0403 |
| MRPL33   | mitochondrial ribosomal protein L33                                      | 1.21 | 0.0542 |
| MTX1     | metaxin 1                                                                | 1.21 | 0.0513 |
| TIMM8A   | translocase of inner mitochondrial membrane 8 homolog A                  | 1.21 | 0.0534 |
| STOML2   | stomatin (EPB72)-like 2                                                  | 1.21 | 0.0209 |
| MRPL2    | mitochondrial ribosomal protein L2                                       | 1.21 | 0.0510 |
| TIMM8B   | similar to translocase of inner mitochondrial membrane 8 homolog B       | 1.21 | 0.0529 |
| ECH1     | enoyl Coenzyme A hydratase 1                                             | 1.21 | 0.0298 |
| C6orf57  | chromosome 6 open reading frame 57                                       | 1.20 | 0.0526 |
| C1orf31  | chromosome 1 open reading frame 31                                       | 1.20 | 0.0425 |
| MRPS33   | mitochondrial ribosomal protein S33                                      | 1.20 | 0.0237 |
| CD52     | CD52 molecule                                                            | 1.20 | 0.0454 |
| PLEC     | plectin 1                                                                | 1.19 | 0.0101 |
| BRWD1    | bromodomain and WD repeat domain containing 1                            | 1.18 | 0.0213 |
| PAG10    | phosphoprotein membrane anchor with glycosphingolipid microdomains 1     | 1.18 | 0.0268 |
| RCHY1    | ring finger and CHY zinc finger domain containing 1                      | 1.18 | 0.0286 |
| ETNK1    | ethanolamine kinase 1                                                    | 1.17 | 0.0475 |
| SIVA1    | SIVA1, apoptosis-inducing factor                                         | 1.17 | 0.0340 |
| GSTM4    | glutathione S-transferase mu 4                                           | 1.17 | 0.0254 |
| CEP350   | centrosomal protein 350kDa                                               | 1.17 | 0.0498 |
| MORN4    | MORN repeat containing 4                                                 | 1.17 | 0.0512 |
| VAMP8    | vesicle-associated membrane protein 8                                    | 1.17 | 0.0530 |
| SDHAF1   | succinate dehydrogenase complex assembly factor 1                        | 1.17 | 0.0216 |
| FRAT2    | frequently rearranged in advanced T-cell lymphomas 2                     | 1.16 | 0.0524 |
| NRAP     | nebulin-related anchoring protein                                        | 1.15 | 0.0405 |
| ERP29    | endoplasmic reticulum protein 29                                         | 1.14 | 0.0367 |
| CABIN1   | calcineurin binding protein 1                                            | 1.14 | 0.0171 |
| TCEA2    | transcription elongation factor A (SII), 2                               | 1.11 | 0.0353 |
| PAK2     | p21 (RAC) activated kinase 2                                             | 0.90 | 0.0274 |
| KAT2B    | K(lysine) acetyltransferase 2B                                           | 0.89 | 0.0319 |
| PRPF3    | PRP3 pre-mRNA processing factor 3                                        | 0.89 | 0.0518 |
| VPS35    | VPS35 rotomer complex component                                          | 0.89 | 0.0320 |
| EXOSC10  | exosome component 10                                                     | 0.89 | 0.0517 |
| PRPF40A  | PRP40 pre-mRNA processing factor 40 homolog A                            | 0.89 | 0.0499 |
| GRHL1    | grainyhead-like 1                                                        | 0.89 | 0.0210 |
| SLC30A6  | solute carrier family 30 member 6                                        | 0.88 | 0.0523 |
| CYLD     | cylindromatosis                                                          | 0.88 | 0.0539 |
| PLAA     | phospholipase A2-activating protein                                      | 0.88 | 0.0407 |
| STARD3NL | STARD3 N-terminal like                                                   | 0.88 | 0.0343 |
| GTF2E1   | general transcription factor IIE subunit 1                               | 0.88 | 0.0345 |
| SMCHD1   | structural maintenance of chromosomes flexible hinge domain containing 1 | 0.87 | 0.0336 |

|           |                                                              |      |        |
|-----------|--------------------------------------------------------------|------|--------|
| N6AMT2    | N-6 adenine-specific DNA methyltransferase 2 (putative)      | 0.87 | 0.0536 |
| BUB3      | budding uninhibited by benzimidazoles 3 homolog              | 0.87 | 0.0505 |
| FAM105B   | family with sequence similarity 105, member B                | 0.87 | 0.0387 |
| TPM3      | tropomyosin 3                                                | 0.86 | 0.0542 |
| RAB2B     | RAB2B, member RAS oncogene family                            | 0.86 | 0.0521 |
| HMGB1     | high-mobility group box 1; high-mobility group box 1-like 10 | 0.86 | 0.0356 |
| POLR3GL   | RNA polymerase III subunit G like                            | 0.86 | 0.0391 |
| KCTD6     | potassium channel tetramerisation domain containing 6        | 0.86 | 0.0470 |
| FAM104A   | family with sequence similarity 104 member A                 | 0.86 | 0.0380 |
| PBRM1     | polybromo 1                                                  | 0.86 | 0.0520 |
| SRPRB     | signal recognition particle receptor, B subunit              | 0.86 | 0.0273 |
| PTPRM     | protein tyrosine phosphatase, receptor type M                | 0.86 | 0.0253 |
| OFD1      | oral-facial-digital syndrome 1                               | 0.86 | 0.0387 |
| TGS1      | trimethylguanosine synthase homolog                          | 0.86 | 0.0445 |
| RNF115    | ring finger protein 115                                      | 0.85 | 0.0308 |
| ZNF45     | zinc finger protein 45                                       | 0.85 | 0.0272 |
| RBM17     | RNA binding motif protein 17                                 | 0.85 | 0.0456 |
| HOMEZ     | homeobox and leucine zipper encoding                         | 0.85 | 0.0393 |
| RPL38     | ribosomal protein L38                                        | 0.85 | 0.0456 |
| SENP1     | SUMO1/sentrin specific peptidase 1                           | 0.85 | 0.0434 |
| C1GALT1C1 | C1GALT1-specific chaperone 1                                 | 0.85 | 0.0375 |
| POLR1B    | RNA polymerase I polypeptide B                               | 0.85 | 0.0396 |
| RFWD2     | ring finger and WD repeat domain 2                           | 0.84 | 0.0321 |
| MAP4K3    | mitogen-activated protein kinase kinase kinase kinase 3      | 0.84 | 0.0182 |
| LDOC1L    | leucine zipper, down-regulated in cancer 1-like              | 0.84 | 0.0203 |
| FAM175B   | family with sequence similarity 175, member B                | 0.84 | 0.0218 |
| SFXN4     | sideroflexin 4                                               | 0.84 | 0.0318 |
| ADAM9     | ADAM metallopeptidase domain 9                               | 0.84 | 0.0174 |
| GSPT1     | G1 to S phase transition 1                                   | 0.84 | 0.0177 |
| TSEN15    | tRNA splicing endonuclease 15 homolog                        | 0.84 | 0.0266 |
| RSRC2     | arginine/serine-rich coiled-coil 2                           | 0.84 | 0.0401 |
| ZNF711    | zinc finger protein 711                                      | 0.84 | 0.0072 |
| TMEM106C  | transmembrane protein 106C                                   | 0.84 | 0.0408 |
| CHD7      | chromodomain helicase DNA binding protein 7                  | 0.83 | 0.0202 |
| TPD52     | tumor protein D52                                            | 0.83 | 0.0492 |
| CD63      | CD63 molecule                                                | 0.83 | 0.0102 |
| KIAA1274  | KIAA1274                                                     | 0.83 | 0.0469 |
| VASP      | vasodilator-stimulated phosphoprotein                        | 0.83 | 0.0473 |
| CHD4      | chromodomain helicase DNA binding protein 4                  | 0.83 | 0.0382 |
| CBX3      | chromobox homolog 3                                          | 0.83 | 0.0299 |
| IL13RA1   | interleukin 13 receptor, alpha 1                             | 0.83 | 0.0282 |
| ELF2      | E74-like factor 2                                            | 0.83 | 0.0363 |
| HNRNPH3   | heterogeneous nuclear ribonucleoprotein H3 (2H9)             | 0.83 | 0.0475 |
| NMD3      | NMD3 homolog                                                 | 0.82 | 0.0183 |

|           |                                                              |      |        |
|-----------|--------------------------------------------------------------|------|--------|
| CCDC47    | coiled-coil domain containing 47                             | 0.82 | 0.0366 |
| VMP1      | vacuole membrane protein 1                                   | 0.82 | 0.0312 |
| RNF103    | ring finger protein 103                                      | 0.82 | 0.0537 |
| CST3      | cystatin C                                                   | 0.82 | 0.0274 |
| RUNX1     | runt-related transcription factor 1                          | 0.82 | 0.0464 |
| ARRDC3    | arrestin domain containing 3                                 | 0.82 | 0.0497 |
| NPM1      | nucleophosmin 1                                              | 0.82 | 0.0484 |
| S100A11P1 | S100 calcium binding protein A11                             | 0.82 | 0.0118 |
| MAP3K7    | mitogen-activated protein kinase kinase kinase 7             | 0.82 | 0.0398 |
| BTBD10    | BTB (POZ) domain containing 10                               | 0.82 | 0.0077 |
| CSRP3     | cysteine and glycine-rich protein 3                          | 0.82 | 0.0304 |
| AZIN1     | antizyme inhibitor 1                                         | 0.81 | 0.0126 |
| TRIM5     | tripartite motif-containing 5                                | 0.81 | 0.0019 |
| PNRC2     | proline-rich nuclear receptor coactivator 2                  | 0.81 | 0.0186 |
|           | tyrosine 3-monooxygenase/tryptophan 5-monooxygenase          | 0.81 |        |
| YWHAH     | activation protein eta                                       |      | 0.0377 |
| PRKAG2    | protein kinase, AMP-activated, gamma 2 non-catalytic subunit | 0.81 | 0.0470 |
| RBM25     | RNA binding motif protein 25                                 | 0.81 | 0.0448 |
| GPSM2     | G-protein signaling modulator 2                              | 0.81 | 0.0403 |
| GALM      | galactose mutarotase                                         | 0.81 | 0.0314 |
| SEPHS2    | selenophosphate synthetase 2                                 | 0.81 | 0.0084 |
| PPP6R3    | protein phosphatase 6 regulatory subunit 3                   | 0.81 | 0.0355 |
| TCEAL1    | transcription elongation factor A (SII)-like 1               | 0.81 | 0.0318 |
| LAMA4     | laminin, alpha 4                                             | 0.81 | 0.0347 |
| CNTRL     | centriolin                                                   | 0.81 | 0.0161 |
| GNA13     | guanine nucleotide binding protein alpha 13                  | 0.81 | 0.0472 |
| MAF       | v-maf musculoaponeurotic fibrosarcoma oncogene homolog       | 0.81 | 0.0491 |
| PNRC1     | proline-rich nuclear receptor coactivator 1                  | 0.81 | 0.0142 |
| WNK1      | WNK lysine deficient protein kinase 1                        | 0.81 | 0.0541 |
| GLT8D2    | glycosyltransferase 8 domain containing 2                    | 0.80 | 0.0522 |
| WAPAL     | wings apart-like homolog                                     | 0.80 | 0.0168 |
| IER3IP1   | immediate early response 3 interacting protein 1             | 0.80 | 0.0404 |
| USP8      | ubiquitin specific peptidase 8                               | 0.80 | 0.0201 |
| TUBA1A    | tubulin, alpha 1a                                            | 0.80 | 0.0425 |
| HFE       | hemochromatosis                                              | 0.80 | 0.0300 |
| MANBA     | mannosidase, beta A, lysosomal                               | 0.80 | 0.0413 |
| CSDE1     | cold shock domain containing E1, RNA-binding                 | 0.80 | 0.0398 |
| ACLY      | ATP citrate lyase                                            | 0.80 | 0.0422 |
| DERA      | 2-deoxyribose-5-phosphate aldolase homolog                   | 0.80 | 0.0541 |
| KDM3B     | lysine (K)-specific demethylase 3B                           | 0.80 | 0.0443 |
| KDM1B     | lysine demethylase 1B                                        | 0.80 | 0.0123 |
| MAK16     | MAK16 homolog                                                | 0.80 | 0.0532 |
| C1orf21   | chromosome 1 open reading frame 21                           | 0.80 | 0.0345 |
| TM9SF1    | transmembrane 9 superfamily member 1                         | 0.80 | 0.0405 |

|         |                                                             |      |        |
|---------|-------------------------------------------------------------|------|--------|
| DDX50   | DEAD (Asp-Glu-Ala-Asp) box polypeptide 50                   | 0.79 | 0.0343 |
| CAMKK2  | calcium/calmodulin-dependent protein kinase kinase 2, beta  | 0.79 | 0.0167 |
| RARA    | retinoic acid receptor, alpha                               | 0.79 | 0.0153 |
| PLRG1   | pleiotropic regulator 1                                     | 0.79 | 0.0159 |
| SNRNP40 | small nuclear ribonucleoprotein 40kDa (U5)                  | 0.79 | 0.0285 |
| SRSF1   | serine and arginine rich splicing factor 1                  | 0.79 | 0.0237 |
| RNF20   | ring finger protein 20                                      | 0.78 | 0.0482 |
| HNRNPH2 | heterogeneous nuclear ribonucleoprotein H2                  | 0.78 | 0.0187 |
| PTGER3  | prostaglandin E receptor 3                                  | 0.78 | 0.0374 |
| LUC7L2  | LUC7-like 2                                                 | 0.78 | 0.0057 |
| EXOSC2  | exosome component 2                                         | 0.78 | 0.0295 |
| ST6GAL2 | ST6 beta-galactosamide alpha-2,6-sialyltransferase 2        | 0.78 | 0.0013 |
| PLN     | phospholamban                                               | 0.77 | 0.0192 |
| RNF146  | ring finger protein 146                                     | 0.77 | 0.0140 |
| PDCD7   | programmed cell death 7                                     | 0.77 | 0.0124 |
| GPC4    | glypican 4                                                  | 0.77 | 0.0526 |
| LGMN    | legumain                                                    | 0.77 | 0.0186 |
| ABR     | active BCR-related gene                                     | 0.76 | 0.0341 |
| PRKAB2  | protein kinase, AMP-activated, beta 2 non-catalytic subunit | 0.76 | 0.0064 |
| MBD4    | methyl-CpG binding domain protein 4                         | 0.75 | 0.0330 |
| NUDT16  | nudix hydroxylase 16                                        | 0.75 | 0.0186 |
| TMEM87B | transmembrane protein 87B                                   | 0.75 | 0.0209 |
| PALMD   | palmelphin                                                  | 0.75 | 0.0375 |
| CYFIP1  | cytoplasmic FMR1 interacting protein 1                      | 0.75 | 0.0287 |
| THRAP3  | thyroid hormone receptor associated protein 3               | 0.75 | 0.0399 |
| FAM105A | family with sequence similarity 105, member A               | 0.74 | 0.0510 |
| C9orf78 | chromosome 9 open reading frame 78                          | 0.74 | 0.0006 |
| FCGRT   | Fc fragment of IgG, receptor, transporter, alpha            | 0.74 | 0.0343 |
| SPTBN2  | spectrin, beta, non-erythrocytic 2                          | 0.74 | 0.0361 |
| FBXO21  | F-box protein 21                                            | 0.74 | 0.0086 |
| BAG2    | BCL2-associated athanogene 2                                | 0.74 | 0.0492 |
| CALU    | calumenin                                                   | 0.73 | 0.0288 |
| FABP5   | fatty acid binding protein 5                                | 0.73 | 0.0316 |
| PDE4B   | phosphodiesterase 4B, cAMP-specific                         | 0.73 | 0.0196 |
| SLMAP   | sarcolemma associated protein                               | 0.73 | 0.0438 |
| CNOT10  | CCR4-NOT transcription complex, subunit 10                  | 0.73 | 0.0071 |
| GATA6   | GATA binding protein 6                                      | 0.73 | 0.0439 |
| AKAP7   | A kinase (PRKA) anchor protein 7                            | 0.73 | 0.0256 |
| SORBS2  | sorbin and SH3 domain containing 2                          | 0.73 | 0.0501 |
| MITF    | microphthalmia-associated transcription factor              | 0.73 | 0.0485 |
| ENPP5   | ectonucleotide pyrophosphatase/phosphodiesterase 5          | 0.70 | 0.0137 |
| SAMD4A  | sterile alpha motif domain containing 4A                    | 0.70 | 0.0470 |
| GLUL    | glutamate-ammonia ligase                                    | 0.70 | 0.0045 |
| TRIM45  | tripartite motif-containing 45                              | 0.70 | 0.0497 |

|           |                                                    |      |        |
|-----------|----------------------------------------------------|------|--------|
| C20orf108 | chromosome 20 open reading frame 108               | 0.68 | 0.0121 |
| RASL11B   | RAS-like, family 11, member B                      | 0.68 | 0.0236 |
| CSDA      | cold shock domain protein A                        | 0.67 | 0.0375 |
| EEF1A1    | eukaryotic translation elongation factor 1 alpha 1 | 0.67 | 0.0517 |
| CAST      | calpastatin                                        | 0.65 | 0.0144 |
| TXNIP     | thioredoxin interacting protein                    | 0.64 | 0.0151 |
| DNAJC21   | DnaJ (Hsp40) homolog, subfamily C, member 21       | 0.64 | 0.0008 |
| DPY19L1   | dpy-19-like 1                                      | 0.63 | 0.0088 |
| TMOD3     | tropomodulin 3                                     | 0.62 | 0.0133 |
