# Supplementary material for: A Transcriptomic Model of Postnatal Cardiac Effects of Prenatal Maternal Cortisol Excess in Sheep
Source: PubMed Central journal article supplement (PMC6616147; doi:10.3389/fphys.2019.00816), 2019-07-03
Supplement: Table_3.pdf [file Table_3.pdf]

Supplemental Table 3: Differentially expressed genes (p<0.05) in Epicardial Adipose tissue of 2week old lambs after maternal cortisol treatment

Fold changes are expressed as values in lambs of cortisol-treated ewes compared to control lambs

| <b>OFFICIAL SYMBOL</b> | <b>Gene Name</b>                                                              | <b>Fold Change</b> | <b>P.Value</b> |
|------------------------|-------------------------------------------------------------------------------|--------------------|----------------|
| GBP2                   | guanylate binding protein 2, interferon-inducible                             | 3.12               | 0.0093         |
| FAM26F                 | family with sequence similarity 26, member F                                  | 1.87               | 0.0143         |
| GSTM4                  | glutathione S-transferase mu 4                                                | 1.76               | 0.0074         |
| GLRX                   | glutaredoxin (thioltransferase)                                               | 1.75               | 0.0219         |
| SNHG12                 | small nucleolar RNA host gene 12 (non-protein coding)                         | 1.72               | 0.0199         |
| C10orf10               | chromosome 10 open reading frame 10                                           | 1.70               | 0.0409         |
| TOR3A                  | torsin family 3, member A                                                     | 1.61               | 0.0085         |
| TANC1                  | tetratricopeptide repeat, ankyrin repeat and coiled-coil containing 1         | 1.52               | 0.0033         |
| FOS                    | v-fos FBJ murine osteosarcoma viral oncogene homolog                          | 1.52               | 0.0143         |
| IGH@                   | immunoglobulin heavy locus                                                    | 1.51               | 0.0446         |
| RGS3                   | regulator of G-protein signaling 3                                            | 1.50               | 0.0009         |
| C16orf54               | chromosome 16 open reading frame 54                                           | 1.46               | 0.0007         |
| RGS1                   | regulator of G-protein signaling 1                                            | 1.46               | 0.0101         |
| GBP7                   | guanylate binding protein 7                                                   | 1.45               | 0.0369         |
| GALP                   | galanin-like peptide                                                          | 1.45               | 0.0114         |
| TMCO1                  | transmembrane and coiled-coil domains 1                                       | 1.40               | 0.0244         |
| DPT                    | dermatopontin                                                                 | 1.39               | 0.0161         |
| ARNT                   | aryl hydrocarbon receptor nuclear translocator                                | 1.38               | 0.0252         |
| LOC615263              |                                                                               | 1.37               | 0.0371         |
| PARG                   | similar to poly (ADP-ribose) glycohydrolase; poly (ADP-ribose) glycohydrolase | 1.36               | 0.0281         |
| CYP2G2P                | cytochrome P450, family 2, subfamily G, polypeptide 2 pseudogene              | 1.36               | 0.0304         |
| MAD2L2                 | MAD2 mitotic arrest deficient-like 2 (yeast)                                  | 1.35               | 0.0093         |
| PRKG1                  | protein kinase, cGMP-dependent, type I                                        | 1.35               | 0.0192         |
| HNRNPA2B1              | heterogeneous nuclear ribonucleoprotein A2/B1                                 | 1.35               | 0.0128         |
| NSRP1                  | nuclear speckle splicing regulatory protein 1                                 | 1.33               | 0.0209         |
| PARVG                  | parvin, gamma                                                                 | 1.33               | 0.0442         |
| DVL1                   | dishevelled, dsh homolog 1 (Drosophila)                                       | 1.33               | 0.0046         |
| TRIB1                  | tribbles homolog 1 (Drosophila)                                               | 1.33               | 0.0353         |
| FAM43A                 | family with sequence similarity 43, member A                                  | 1.31               | 0.0296         |
| ITPKB                  | inositol 1,4,5-trisphosphate 3-kinase B                                       | 1.31               | 0.0473         |
| LEP                    | leptin                                                                        | 1.31               | 0.0390         |
| ANXA1                  | annexin A1                                                                    | 1.31               | 0.0391         |
| KDR                    | kinase insert domain receptor                                                 | 1.30               | 0.0348         |

|            |                                                                                                               |      |        |
|------------|---------------------------------------------------------------------------------------------------------------|------|--------|
| COTL1      | coactosin-like 1 (Dictyostelium)                                                                              | 1.30 | 0.0142 |
| PFDN2      | prefoldin subunit 2                                                                                           | 1.29 | 0.0201 |
| CLCN6      | chloride channel 6                                                                                            | 1.29 | 0.0156 |
| GPR116     | G protein-coupled receptor 116, name changed to adhesion related...                                           | 1.29 | 0.0025 |
| ZFYVE26    | zinc finger, FYVE domain containing 26                                                                        | 1.29 | 0.0226 |
| WDR33      | WD repeat domain 33                                                                                           | 1.28 | 0.0481 |
| EBF4       | early B-cell factor 4                                                                                         | 1.28 | 0.0413 |
| FLT1       | fms-related tyrosine kinase 1                                                                                 | 1.28 | 0.0181 |
| ANP32A     | Acidic Nuclear Phosphoprotein 32 Family Member A                                                              | 1.28 | 0.0321 |
| PLOD1      | procollagen-lysine 1, 2-oxoglutarate 5-dioxygenase 1                                                          | 1.27 | 0.0313 |
| DCAF7      | WD repeat domain 68                                                                                           | 1.27 | 0.0400 |
| NOTCH4     | Notch homolog 4 (Drosophila)                                                                                  | 1.27 | 0.0449 |
| ADCY4      | adenylate cyclase 4                                                                                           | 1.26 | 0.0171 |
| TMCC1      | transmembrane and coiled-coil domain family 1                                                                 | 1.26 | 0.0482 |
| SAMSN1     | SAM domain, SH3 domain and nuclear localization signals 1                                                     | 1.26 | 0.0309 |
| DAAM1      | dishevelled associated activator of morphogenesis 1                                                           | 1.25 | 0.0056 |
| TNFRSF21   | tumor necrosis factor receptor superfamily, member 21                                                         | 1.25 | 0.0462 |
| SETMAR     | SET domain and mariner transposase fusion gene                                                                | 1.25 | 0.0428 |
| TAF5       | TAF5 RNA polymerase II, TATA box binding protein (TBP)-associated factor, 100kDa                              | 1.25 | 0.0060 |
| MAP3K6     | mitogen-activated protein kinase kinase kinase 6                                                              | 1.25 | 0.0419 |
| LURAP1L    | leucine rich adaptor protein 1-like                                                                           | 1.24 | 0.0098 |
| ZCCHC10    | zinc finger, CCHC domain containing 10                                                                        | 1.24 | 0.0268 |
| TEX10      | testis expressed 10                                                                                           | 1.24 | 0.0459 |
| TASP1      | taspase, threonine aspartase, 1                                                                               | 1.24 | 0.0478 |
| C1orf85    | chromosome 1 open reading frame 85                                                                            | 1.23 | 0.0421 |
| PHACTR4    | phosphatase and actin regulator 4                                                                             | 1.23 | 0.0302 |
| RPS24      | ribosomal protein S24                                                                                         | 1.23 | 0.0321 |
| MYOC       | myocilin, trabecular meshwork inducible glucocorticoid response                                               | 1.23 | 0.0388 |
| PELI1      | pellino homolog 1 (Drosophila)                                                                                | 1.22 | 0.0429 |
| CHRNE      | cholinergic receptor, nicotinic, epsilon                                                                      | 1.22 | 0.0177 |
| PCMT1      | protein-L-isoaspartate (D-aspartate) O-methyltransferase                                                      | 1.22 | 0.0403 |
| PGAM1      | phosphoglycerate mutase 1 (brain)                                                                             | 1.22 | 0.0413 |
| ZNF90      | zinc finger protein 90                                                                                        | 1.21 | 0.0471 |
| CDK19      | cell division cycle 2-like 6 (CDK8-like)                                                                      | 1.21 | 0.0058 |
| CTNND1     | catenin (cadherin-associated protein), delta 1                                                                | 1.21 | 0.0497 |
| SUPT16H    | suppressor of Ty 16 homolog (S. cerevisiae)                                                                   | 1.20 | 0.0279 |
| PLEKHG4    | pleckstrin homology domain containing, family G (with RhoGef domain) member 4                                 | 1.20 | 0.0129 |
| ST6GALNAC2 | ST6 (alpha-N-acetyl-neuraminyl-2,3-beta-galactosyl-1,3)-N-acetylgalactosaminide alpha-2,6-sialyltransferase 2 | 1.20 | 0.0487 |

|          |                                                                                      |      |        |
|----------|--------------------------------------------------------------------------------------|------|--------|
| NOTCH3   | Notch homolog 3 ( <i>Drosophila</i> )                                                | 1.20 | 0.0427 |
| MMP14    | matrix metalloproteinase 14 (membrane-inserted)                                      | 1.20 | 0.0364 |
| FAM83H   | family with sequence similarity 83, member H                                         | 1.20 | 0.0313 |
| MEOX2    | mesenchyme homeobox 2                                                                | 1.19 | 0.0136 |
| SEPT1    | septin 1                                                                             | 1.19 | 0.0383 |
| USHBP1   | Usher syndrome 1C binding protein 1                                                  | 1.19 | 0.0481 |
| DYSF     | dysferlin, limb girdle muscular dystrophy 2B (autosomal recessive)                   | 1.19 | 0.0278 |
| LMO2     | LIM domain only 2 (rhombotin-like 1)                                                 | 1.19 | 0.0468 |
| RGAG4    | retrotransposon gag domain containing 4                                              | 1.18 | 0.0331 |
| PIAS2    | protein inhibitor of activated STAT, 2                                               | 1.18 | 0.0270 |
| UPF2     | UPF2 regulator of nonsense transcripts homolog (yeast)                               | 1.18 | 0.0402 |
| KHNYN    | KIAA0323                                                                             | 1.17 | 0.0412 |
| KDM3A    | lysine (K)-specific demethylase 3A                                                   | 1.17 | 0.0391 |
| DEK      | DEK oncogene                                                                         | 1.17 | 0.0413 |
| PCF11    | PCF11, cleavage and polyadenylation factor subunit, homolog ( <i>S. cerevisiae</i> ) | 1.17 | 0.0399 |
| TMEM140  | transmembrane protein 140                                                            | 1.17 | 0.0427 |
| STK19    | serine/threonine kinase 19                                                           | 1.16 | 0.0497 |
| POLE3    | polymerase (DNA directed), epsilon 3 (p17 subunit)                                   | 1.16 | 0.0423 |
| C6orf132 | chromosome 6 open reading frame 132                                                  | 1.16 | 0.0249 |
| IRF2BP2  | interferon regulatory factor 2 binding protein 2                                     | 1.13 | 0.0407 |
| APLP2    | amyloid beta (A4) precursor-like protein 2                                           | 1.13 | 0.0393 |
| BMP2K    | BMP2 inducible kinase                                                                | 1.13 | 0.0498 |
| EP300    | E1A binding protein p300                                                             | 1.10 | 0.0411 |
| ANAPC7   | anaphase promoting complex subunit 7                                                 | 0.89 | 0.0499 |
| SGSM3    | small G protein signaling modulator 3                                                | 0.89 | 0.0401 |
| FKBP2    | FK506 binding protein 2, 13kDa                                                       | 0.89 | 0.0376 |
| MAP3K7   | mitogen-activated protein kinase kinase kinase 7                                     | 0.89 | 0.0192 |
| USP14    | ubiquitin specific peptidase 14 (tRNA-guanine transglycosylase)                      | 0.88 | 0.0368 |
| UBL3     | ubiquitin-like 3                                                                     | 0.88 | 0.0410 |
| VTI1B    | vesicle transport through interaction with t-SNAREs homolog 1B (yeast)               | 0.88 | 0.0391 |
| TTC1     | tetratricopeptide repeat domain 1                                                    | 0.88 | 0.0412 |
| ERGIC2   | ERGIC and golgi 2                                                                    | 0.88 | 0.0459 |
| UBE2F    | ubiquitin-conjugating enzyme E2F (putative)                                          | 0.87 | 0.0300 |
| PIGP     | phosphatidylinositol glycan anchor biosynthesis, class P                             | 0.87 | 0.0424 |
| GPANK1   | G patch domain and ankyrin repeats 1                                                 | 0.87 | 0.0226 |
| RBM45    | RNA binding motif protein 45                                                         | 0.87 | 0.0293 |
| TMEM186  | transmembrane protein 186                                                            | 0.87 | 0.0230 |
| CHAC2    | ChaC, cation transport regulator homolog 2 ( <i>E. coli</i> )                        | 0.87 | 0.0445 |
| MFF      | mitochondrial fission factor                                                         | 0.87 | 0.0331 |

|          |                                                                           |      |        |
|----------|---------------------------------------------------------------------------|------|--------|
| DNASE1L1 | deoxyribonuclease I-like 1                                                | 0.87 | 0.0327 |
| RAB10    | RAB10, member RAS oncogene family                                         | 0.87 | 0.0083 |
| CMBL     | carboxymethylenebutenolidase homolog (Pseudomonas)                        | 0.87 | 0.0454 |
| WDR41    | WD repeat domain 41                                                       | 0.87 | 0.0177 |
| CCT5     | chaperonin containing TCP1, subunit 5 (epsilon)                           | 0.87 | 0.0455 |
| FXN      | frataxin                                                                  | 0.87 | 0.0328 |
| RWDD1    | RWD domain containing 1-like 1; RWD domain containing 1                   | 0.86 | 0.0374 |
| COX5B    | cytochrome c oxidase subunit Vb                                           | 0.86 | 0.0416 |
| INTS10   | integrator complex subunit 10                                             | 0.86 | 0.0237 |
| RPLP2    | ribosomal protein, large, P2 pseudogene 3                                 | 0.86 | 0.0474 |
| LMBRD1   | LMBR1 domain containing 1                                                 | 0.86 | 0.0492 |
| MRPL11   | mitochondrial ribosomal protein L11                                       | 0.86 | 0.0281 |
| DERL1    | Der1-like domain family, member 1                                         | 0.86 | 0.0427 |
| RPS25    | ribosomal protein S25 pseudogene 8                                        | 0.86 | 0.0346 |
| NHP2     | NHP2 ribonucleoprotein homolog (yeast)                                    | 0.86 | 0.0291 |
| HMGCS1   | 3-hydroxy-3-methylglutaryl-Coenzyme A synthase 1 (soluble)                | 0.86 | 0.0377 |
| BTBD10   | BTB (POZ) domain containing 10                                            | 0.85 | 0.0405 |
| ASMTL    | acetylserotonin O-methyltransferase-like                                  | 0.85 | 0.0489 |
| SLC25A26 | solute carrier family 25, member 26                                       | 0.85 | 0.0083 |
| MTCH2    | mitochondrial carrier homolog 2 (C. elegans)                              | 0.85 | 0.0484 |
| BCL2L13  | BCL2-like 13 (apoptosis facilitator)                                      | 0.85 | 0.0137 |
| DOHH     | deoxyhypusine hydroxylase/monooxygenase                                   | 0.85 | 0.0110 |
| PECR     | peroxisomal trans-2-enoyl-CoA reductase                                   | 0.85 | 0.0360 |
| NUBP1    | nucleotide binding protein 1 (MinD homolog, E. coli)                      | 0.85 | 0.0119 |
| SEPW1    | selenoprotein W, 1                                                        | 0.85 | 0.0236 |
| DTYMK    | deoxythymidylate kinase (thymidylate kinase)                              | 0.85 | 0.0402 |
| WRB      | tryptophan rich basic protein                                             | 0.85 | 0.0408 |
| PAFAH1B2 | platelet-activating factor acetylhydrolase, isoform Ib, subunit 2 (30kDa) | 0.85 | 0.0446 |
| NIPA2    | non imprinted in Prader-Willi/Angelman syndrome 2                         | 0.85 | 0.0149 |
| MT-ND1   | Mitochondrially Encoded NADH:Ubiquinone Oxidoreductase Core Subunit 1     | 0.85 | 0.0074 |
| SLA2     | Src-like-adaptor 2                                                        | 0.85 | 0.0089 |
| TM9SF1   | transmembrane 9 superfamily member 1                                      | 0.85 | 0.0470 |
| KIAA0020 | KIAA0020                                                                  | 0.84 | 0.0417 |
| MARCH6   | membrane-associated ring finger (C3HC4) 6                                 | 0.84 | 0.0379 |
| TBC1D7   | TBC1 domain family, member 7                                              | 0.84 | 0.0143 |
| AFF4     | AF4/FMR2 family, member 4                                                 | 0.84 | 0.0263 |
| XRCC5    | X-ray repair complementing defective repair in Chinese hamster cells 5    | 0.84 | 0.0477 |
| UBE2G2   | ubiquitin-conjugating enzyme E2G 2 (UBC7 homolog, yeast)                  | 0.84 | 0.0129 |
| ATPAF2   | ATP synthase mitochondrial F1 complex assembly factor 2                   | 0.84 | 0.0281 |

|          |                                                                     |      |        |
|----------|---------------------------------------------------------------------|------|--------|
| TMEM179B | transmembrane protein 179B                                          | 0.84 | 0.0228 |
| HPCAL1   | hippocalcin-like 1                                                  | 0.84 | 0.0332 |
| TMEM192  | transmembrane protein 192                                           | 0.84 | 0.0246 |
| IP6K1    | inositol hexakisphosphate kinase 1                                  | 0.84 | 0.0343 |
| GEMIN4   | gem (nuclear organelle) associated protein 4                        | 0.84 | 0.0071 |
| CCDC56   | coiled-coil domain containing 56                                    | 0.84 | 0.0179 |
| MRPL43   | mitochondrial ribosomal protein L43                                 | 0.83 | 0.0364 |
| EXOSC2   | exosome component 2                                                 | 0.83 | 0.0052 |
| MLYCD    | malonyl-CoA decarboxylase                                           | 0.83 | 0.0439 |
| TMEM134  | transmembrane protein 134                                           | 0.83 | 0.0199 |
| C9orf78  | chromosome 9 open reading frame 78                                  | 0.83 | 0.0253 |
| TRMT1    | TRM1 tRNA methyltransferase 1 homolog ( <i>S. cerevisiae</i> )      | 0.83 | 0.0425 |
| TFAM     | transcription factor A, mitochondrial                               | 0.83 | 0.0200 |
| RASGEF1A | RasGEF domain family, member 1A                                     | 0.83 | 0.0235 |
| LAMP2    | lysosomal-associated membrane protein 2                             | 0.83 | 0.0318 |
| GMDS     | GDP-mannose 4,6-dehydratase                                         | 0.83 | 0.0273 |
| ROBO2    | roundabout, axon guidance receptor, homolog 2 ( <i>Drosophila</i> ) | 0.83 | 0.0424 |
| ESYT2    | family with sequence similarity 62 (C2 domain containing), member B | 0.83 | 0.0399 |
| POC1B    | WD repeat domain 51B                                                | 0.83 | 0.0438 |
| TXN2     | thioredoxin 2                                                       | 0.83 | 0.0428 |
| TCEB3B   | transcription elongation factor B polypeptide 3B (elongin A2)       | 0.83 | 0.0070 |
| WDR76    | WD repeat domain 76                                                 | 0.83 | 0.0472 |
| OGN      | osteoglycin                                                         | 0.83 | 0.0232 |
| SREK1IP1 | SREK1-interacting protein 1                                         | 0.83 | 0.0160 |
| B4GALT5  | UDP-Gal:betaGlcNAc beta 1,4- galactosyltransferase, polypeptide 5   | 0.83 | 0.0037 |
| TSEN15   | tRNA splicing endonuclease 15 homolog ( <i>S. cerevisiae</i> )      | 0.82 | 0.0186 |
| CHURC1   | churchill domain containing 1                                       | 0.82 | 0.0262 |
| DCTPP1   | dCTP pyrophosphatase 1                                              | 0.82 | 0.0266 |
| RAP2A    | RAP2A, member of RAS oncogene family                                | 0.82 | 0.0339 |
| TANGO2   | transport and golgi organization 2 homolog ( <i>Drosophila</i> )    | 0.82 | 0.0412 |
| FAM204A  | family with sequence similarity 204, member A                       | 0.82 | 0.0220 |
| HK1      | hexokinase 1                                                        | 0.82 | 0.0338 |
| PSMB1    | proteasome (prosome, macropain) subunit, beta type, 1               | 0.82 | 0.0191 |
| C12orf24 |                                                                     | 0.82 | 0.0249 |
| COX6B1   | cytochrome c oxidase subunit Vib polypeptide 1 (ubiquitous)         | 0.82 | 0.0159 |
| ARID1B   | AT rich interactive domain 1B (SWI1-like)                           | 0.81 | 0.0196 |
| STK40    | serine/threonine kinase 40                                          | 0.81 | 0.0342 |
| COA7     | cytochrome c oxidase assembly factor 7 (putative)                   | 0.81 | 0.0393 |
| WDR45    | WD repeat domain 45                                                 | 0.81 | 0.0335 |

|           |                                                                                 |      |        |
|-----------|---------------------------------------------------------------------------------|------|--------|
| ALDH5A1   | aldehyde dehydrogenase 5 family, member A1                                      | 0.81 | 0.0218 |
| EIF2S1    | eukaryotic translation initiation factor 2, subunit 1 alpha, 35kD               | 0.81 | 0.0051 |
| STK39     | serine threonine kinase 39 (STE20/SPS1 homolog, yeast)                          | 0.81 | 0.0054 |
| GLRX5     | glutaredoxin 5                                                                  | 0.80 | 0.0162 |
| MIF4GD    | MIF4G domain containing                                                         | 0.80 | 0.0347 |
| TM7SF2    | transmembrane 7 superfamily member 2                                            | 0.80 | 0.0160 |
| FAM185BP  | family with sequence similarity 185, member B pseudogene                        | 0.80 | 0.0123 |
| VDAC1     | voltage-dependent anion channel 1; similar to voltage-dependent anion channel 1 | 0.80 | 0.0185 |
| PRADC1    | protease-associated domain containing 1                                         | 0.80 | 0.0098 |
| SFXN4     | sideroflexin 4                                                                  | 0.80 | 0.0148 |
| TSNAX     | translin-associated factor X                                                    | 0.80 | 0.0250 |
| CNOT6     | CCR4-NOT transcription complex, subunit 6                                       | 0.80 | 0.0225 |
| C20orf29  | chromosome 20 open reading frame 29                                             | 0.80 | 0.0123 |
| NDUFAB1   | NADH dehydrogenase (ubiquinone) 1, alpha/beta subcomplex, 1, 8kDa               | 0.79 | 0.0117 |
| RNF146    | ring finger protein 146                                                         | 0.79 | 0.0231 |
| C19orf48  | chromosome 19 open reading frame 48                                             | 0.79 | 0.0420 |
| PTGR2     | prostaglandin reductase 2                                                       | 0.79 | 0.0011 |
| PRPF4     | PRP4 pre-mRNA processing factor 4 homolog (yeast)                               | 0.79 | 0.0035 |
| COX6C     | cytochrome c oxidase subunit VIc                                                | 0.79 | 0.0406 |
| VPS13B    | vacuolar protein sorting 13 homolog B (yeast)                                   | 0.79 | 0.0100 |
| ECHS1     | enoyl Coenzyme A hydratase, short chain, 1, mitochondrial                       | 0.79 | 0.0171 |
| TSN       | translin                                                                        | 0.79 | 0.0088 |
| TIPRL     | TIP41, TOR signaling pathway regulator-like (S. cerevisiae)                     | 0.79 | 0.0482 |
| C11orf54  | chromosome 11 open reading frame 54                                             | 0.79 | 0.0218 |
| HSD17B1   | hydroxysteroid (17-beta) dehydrogenase 1                                        | 0.78 | 0.0107 |
| DCTN5     | dynactin 5 (p25)                                                                | 0.78 | 0.0147 |
| MBD4      | methyl-CpG binding domain protein 4                                             | 0.78 | 0.0495 |
| ACACB     | acetyl-Coenzyme A carboxylase beta                                              | 0.78 | 0.0449 |
| HINT2     | histidine triad nucleotide binding protein 2                                    | 0.78 | 0.0203 |
| FHIT      | fragile histidine triad gene                                                    | 0.77 | 0.0185 |
| MTFP1     | mitochondrial fission process 1                                                 | 0.77 | 0.0428 |
| POLR1B    | polymerase (RNA) I polypeptide B, 128kDa                                        | 0.77 | 0.0040 |
| DLST      | dihydrolipoamide S-succinyltransferase                                          | 0.77 | 0.0147 |
| CRLS1     | cardiolipin synthase 1                                                          | 0.77 | 0.0376 |
| FES       | feline sarcoma oncogene                                                         | 0.77 | 0.0029 |
| MSI2      | musashi homolog 2 (Drosophila)                                                  | 0.77 | 0.0390 |
| OBFC2A    | oligonucleotide/oligosaccharide-binding fold containing 2A                      | 0.77 | 0.0021 |
| ALDH1A1   | aldehyde dehydrogenase 1 family, member A1                                      | 0.77 | 0.0040 |
| TNFRSF13B | tumor necrosis factor receptor superfamily, member 13B                          | 0.76 | 0.0251 |

|          |                                                                                                                                      |      |        |
|----------|--------------------------------------------------------------------------------------------------------------------------------------|------|--------|
| HADHB    | hydroxyacyl-Coenzyme A dehydrogenase/3-ketoacyl-Coenzyme A thiolase/enoyl-Coenzyme A hydratase (trifunctional protein), beta subunit | 0.76 | 0.0279 |
| TMEM106C | transmembrane protein 106C                                                                                                           | 0.76 | 0.0354 |
| UCK1     | uridine-cytidine kinase 1                                                                                                            | 0.76 | 0.0125 |
| MRPL46   | mitochondrial ribosomal protein L46                                                                                                  | 0.75 | 0.0182 |
| COX16    | COX16 cytochrome c oxidase assembly homolog (S. cerevisiae)                                                                          | 0.75 | 0.0181 |
| DLD      | dihydrolipoamide dehydrogenase                                                                                                       | 0.75 | 0.0052 |
| EPHX2    | epoxide hydrolase 2, cytoplasmic                                                                                                     | 0.75 | 0.0030 |
| PANK1    | pantothenate kinase 1                                                                                                                | 0.75 | 0.0354 |
| HMGCS2   | 3-hydroxy-3-methylglutaryl-Coenzyme A synthase 2 (mitochondrial)                                                                     | 0.73 | 0.0481 |
| INSIG1   | insulin induced gene 1                                                                                                               | 0.73 | 0.0302 |
| KCNE3    | potassium voltage-gated channel, Isk-related family, member 3                                                                        | 0.72 | 0.0147 |
| ACSF2    | acyl-CoA synthetase family member 2                                                                                                  | 0.72 | 0.0253 |
| TXNDC9   | thioredoxin domain containing 9                                                                                                      | 0.72 | 0.0271 |
| RBM47    | RNA binding motif protein 47                                                                                                         | 0.72 | 0.0397 |
| PCDHB16  | protocadherin beta 16                                                                                                                | 0.71 | 0.0329 |
| PON3     | paraoxonase 3                                                                                                                        | 0.71 | 0.0138 |
| TRO      | trophinin                                                                                                                            | 0.71 | 0.0107 |
| SOD2     | superoxide dismutase 2, mitochondrial                                                                                                | 0.71 | 0.0016 |
| BIK      | BCL2-interacting killer (apoptosis-inducing)                                                                                         | 0.71 | 0.0252 |
| SBSN     | suprabasin                                                                                                                           | 0.71 | 0.0361 |
| FANCD2   | Fanconi anemia, complementation group D2                                                                                             | 0.70 | 0.0128 |
| ARPC3    | actin related protein 2/3 complex, subunit 3                                                                                         | 0.70 | 0.0137 |
| DNAJC21  | DnaJ (Hsp40) homolog, subfamily C, member 21                                                                                         | 0.70 | 0.0064 |
| F3       | coagulation factor III (thromboplastin, tissue factor)                                                                               | 0.70 | 0.0322 |
| ESR2     | estrogen receptor 2 (ER beta)                                                                                                        | 0.69 | 0.0446 |
| ADA      | adenosine deaminase                                                                                                                  | 0.69 | 0.0380 |
| TNMD     | tenomodulin                                                                                                                          | 0.68 | 0.0275 |
| C4orf47  | chromosome 4 open reading frame 47                                                                                                   | 0.67 | 0.0275 |
| NUDT15   | nudix (nucleoside diphosphate linked moiety X)-type motif 15                                                                         | 0.66 | 0.0185 |
| PEX12    | peroxisomal biogenesis factor 12                                                                                                     | 0.66 | 0.0112 |
| TMEM87B  | transmembrane protein 87B                                                                                                            | 0.65 | 0.0302 |
| SOD1     | superoxide dismutase 1, soluble                                                                                                      | 0.65 | 0.0029 |
| NPPC     | natriuretic peptide precursor C                                                                                                      | 0.63 | 0.0078 |
| CA2      | carbonic anhydrase II                                                                                                                | 0.63 | 0.0409 |
| CAB39L   | calcium binding protein 39-like                                                                                                      | 0.61 | 0.0004 |
| DHRS13   | dehydrogenase/reductase (SDR family) member 13                                                                                       | 0.61 | 0.0476 |
| PLIN2    | adipose differentiation-related protein                                                                                              | 0.60 | 0.0482 |
| GK       | glycerol kinase 3 pseudogene; glycerol kinase                                                                                        | 0.57 | 0.0223 |

|         |                                                                            |      |        |
|---------|----------------------------------------------------------------------------|------|--------|
| UGT1A7  | UDP glucuronosyltransferase 1 family, polypeptide A7                       | 0.55 | 0.0075 |
| FBP2    | fructose-1,6-bisphosphatase 2                                              | 0.54 | 0.0186 |
| MID1IP1 | MID1 interacting protein 1 (gastrulation specific G12 homolog (zebrafish)) | 0.54 | 0.0084 |
| ACLY    | ATP citrate lyase                                                          | 0.53 | 0.0133 |
| LTF     | lactotransferrin                                                           | 0.47 | 0.0002 |
